# Supplementary material for: Thermal Liability of Hyaloclastite in the Krafla Geothermal Reservoir, Iceland: The Impact of Phyllosilicates on Permeability and Rock Strength
Source: Hindawi journal article supplement (doi:10.1155/2020/9057193), 2020-07-14
Supplement: f1 [file 9057193.f1.pdf]

Supplementary information for **“Thermal liability of hyaloclastite in the Krafla geothermal reservoir, Iceland: the impact of phyllosilicates on permeability and rock strength”**

Josh Weaver<sup>1\*</sup>, Guðjón H. Eggertsson<sup>1</sup>, James E.P. Utley<sup>1</sup>, Paul A. Wallace<sup>1</sup>, Anthony Lamur<sup>1</sup>, Jackie E. Kendrick<sup>1</sup>, Hugh Tuffen<sup>2</sup>, Sigurður H. Markússon<sup>3</sup>, Yan Lavallée<sup>1</sup>.

<sup>1</sup>Department of Earth, Ocean and Ecological Sciences, University of Liverpool, 4 Brownlow Street, L69 3GP, Liverpool, UK

<sup>2</sup>Lancaster Environment Centre, Lancaster University, LA1 4YQ, Lancaster, UK

<sup>3</sup>Landsvirkjun, Háaleitisbraut 68, 110 Reykjavík, Iceland

\*j.weaver@liverpool.ac.uk

This file contains the supplementary information used for analysis in the main paper.

## 1. Sample Physical and Mechanical Data

Table S1. A summary of water permeability values at a range of confining pressures.

| Sample                  | Confining pressure | K                 | Porosity reduction |
|-------------------------|--------------------|-------------------|--------------------|
|                         | (MPa)              | (m <sup>2</sup> ) | (%)                |
| HYA_0m_002<br>130°C     | 3.73               | 8.05E-14          | n/a                |
|                         | 7.95               | 7.51E-14          | 0.32               |
|                         | 12.53              | 6.46E-14          | 0.83               |
|                         | 16.96              | 4.87E-14          | 1.27               |
|                         | 23.75              | 2.18E-15          | 2.3                |
|                         | 28.8               | 1.13E-15          | 3.44               |
| HYA_0m_006<br>185°C     | 3.55               | 4.68E-14          | n/a                |
|                         | 9.04               | 5.58E-14          | 0.41               |
|                         | 13.96              | 7.18E-14          | 1.09               |
|                         | 18.91              | 4.96E-14          | 1.86               |
|                         | 23.84              | 2.25E-14          | 2.82               |
|                         | 29.04              | 8.13E-15          | 4.04               |
| HYA_0m_008<br>185°C     | 3.94               | 7.87E-14          | n/a                |
|                         | 8.78               | 7.15E-14          | 0.61               |
|                         | 13.83              | 6.28E-14          | 1.61               |
|                         | 18.78              | 5.07E-14          | 2.58               |
|                         | 23.67              | 3.65E-14          | 3.63               |
|                         | 27.9               | 2.14E-14          | 4.7                |
| HYA_0m_015<br>Untreated | 3.55               | 1.56E-14          | n/a                |
|                         | 8.65               | 1.85E-14          | 0.26               |

|            |       |          |      |
|------------|-------|----------|------|
|            | 13.6  | 1.68E-14 | 0.63 |
|            | 18.65 | 1.63E-14 | 1.12 |
|            | 23.7  | 1.26E-14 | 1.98 |
|            | 28.65 | 4.37E-15 | 3.36 |
| HYA_0m_020 | 3.58  | 5.48E-16 | n/a  |
| Untreated  | 8.53  | 4.42E-16 | 0.31 |
|            | 13.61 | 3.98E-16 | 0.75 |
|            | 18.51 | 7.72E-16 | 1.27 |
|            | 23.56 | 2.67E-16 | 2.09 |
|            | 28.21 | 8.93E-16 | 3.27 |
| HYA_0m_021 | 3.89  | 1.63E-14 | n/a  |
| 130°C      | 8.84  | 1.61E-14 | 0.56 |
|            | 13.54 | 1.56E-14 | 1.37 |
|            | 18.5  | 1.47E-14 | 2.22 |
|            | 23.46 | 1.24E-14 | 3.37 |
|            | 28.4  | 3.59E-15 | 4.89 |
| HYA_0m_035 | 3.27  | 2.28E-15 | n/a  |
| 600°C      | 8.85  | 5.20E-15 | 0.83 |
|            | 13.89 | 6.06E-15 | 2.27 |
|            | 19.28 | 6.58E-15 | 3.56 |
|            | 23.97 | 7.01E-15 | 4.67 |
|            | 28.36 | 6.00E-15 | 5.57 |
| HYA_0m_068 | 3.71  | 5.77E-15 | n/a  |
| 400°C      | 8.58  | 4.66E-15 | 0.74 |
|            | 13.78 | 1.28E-14 | 2.01 |
|            | 18.75 | 1.78E-14 | 3.15 |
|            | 23.45 | 1.53E-14 | 3.7  |
|            | 28.59 | 1.31E-14 | 4.39 |
| HYA_0m_072 | 3.78  | 2.24E-13 | n/a  |
| 600°C      | 8.89  | 1.59E-13 | 0.8  |
|            | 13.7  | 1.37E-13 | 2.2  |
|            | 18.98 | 1.08E-13 | 3.48 |
|            | 23.7  | 1.04E-13 | 4.72 |
|            | 28.79 | 8.21E-14 | 5.84 |
| HYA_0m_076 | 3.46  | 1.10E-13 | n/a  |
| 400°C      | 8.82  | 8.96E-14 | 0.83 |
|            | 13.78 | 8.01E-14 | 2.27 |
|            | 18.35 | 6.93E-14 | 3.56 |
|            | 23.47 | 5.82E-14 | 4.67 |
|            | 28.51 | 4.78E-14 | 5.57 |



|            |        |       |          |     |        |      |      |          |      |      |      |
|------------|--------|-------|----------|-----|--------|------|------|----------|------|------|------|
| HYA_0m_021 | 2.5153 | 37.65 | 1.85E-13 | 130 | 2.6033 | 1.62 | 42.1 | 2.48E-13 | n/a  | n/a  | n/a  |
| HYA_0m_022 | 2.5067 | 38.29 | 1.86E-13 | n/a | n/a    | n/a  | n/a  | n/a      | n/a  | n/a  | n/a  |
| HYA_0m_023 | 2.5323 | 36.14 | 1.81E-13 | 185 | 2.6433 | 1.88 | 41.5 | 2.77E-13 | n/a  | n/a  | n/a  |
| HYA_0m_024 | 2.5975 | 41.82 | 3.72E-13 | n/a | n/a    | n/a  | n/a  | n/a      | 8    | n/a  | 1.15 |
| HYA_0m_025 | 2.5596 | 39.86 | 2.42E-13 | 185 | 2.6195 | 0.79 | 42.4 | 3.02E-13 | 92   | n/a  | 0.95 |
| HYA_0m_026 | 2.5767 | 39.67 | 2.21E-13 | 130 | 2.612  | 0.51 | 41.2 | 2.54E-13 | 11.5 | n/a  | 1.91 |
| HYA_0m_027 | 2.5568 | 40.45 | 1.91E-13 | 130 | 2.5925 | 0.45 | 42.1 | 2.21E-13 | 8.7  | n/a  | 1    |
| HYA_0m_028 | 2.5686 | 41.75 | 2.41E-13 | 185 | 2.6314 | 0.74 | 44.2 | 3.07E-13 | 6.3  | n/a  | 0.66 |
| HYA_0m_029 | 2.5631 | 39.98 | 1.98E-13 | n/a | n/a    | n/a  | n/a  | n/a      | 10.1 | n/a  | 1.43 |
| HYA_0m_030 | 2.5592 | 41.31 | 2.03E-13 | n/a | n/a    | n/a  | n/a  | n/a      | 8.3  | n/a  | 1.18 |
| HYA_0m_031 | 2.5531 | 39.84 | 1.75E-13 | 130 | 2.5938 | 0.54 | 41.6 | 2.03E-13 | 8.4  | n/a  | 1.3  |
| HYA_0m_032 | 2.5471 | 40.24 | 1.30E-13 | 185 | 2.6178 | 0.86 | 43.1 | 1.74E-13 | 10.5 | n/a  | 1.41 |
| HYA_0m_033 | 2.6043 | 40.8  | 4.13E-13 | 185 | 2.6558 | 0.7  | 43   | 4.90E-13 | 7    | n/a  | 0.85 |
| HYA_0m_034 | 2.5514 | 44.13 | 2.50E-13 | 600 | 2.7653 | 2.77 | 45.9 | 5.90E-13 | 6.6  | n/a  | 0.73 |
| HYA_0m_035 | 2.5036 | 37.96 | 1.70E-13 | 600 | 2.7355 | 3.58 | 47.9 | 5.46E-13 | n/a  | n/a  | n/a  |
| HYA_0m_036 | 2.5119 | 41.36 | 1.79E-13 | 600 | 2.7273 | 3.02 | 50.3 | 5.56E-13 | 4.2  | n/a  | 0.49 |
| HYA_0m_037 | 2.5027 | 37.66 | 2.08E-13 | 600 | 2.7279 | 2.74 | 47.1 | 5.55E-13 | n/a  | n/a  | n/a  |
| HYA_0m_038 | 2.527  | 37.89 | 2.17E-13 | 600 | 2.7489 | 2.92 | 47   | 5.68E-13 | n/a  | n/a  | n/a  |
| HYA_0m_039 | 2.5107 | 39.42 | 1.94E-13 | 600 | 2.7325 | 3.21 | 48.7 | 5.86E-13 | 5.3  | n/a  | 0.47 |
| HYA_0m_040 | 2.4976 | 35.7  | 1.73E-13 | 130 | 2.5302 | 0.38 | 39   | 2.13E-13 | n/a  | n/a  | n/a  |
| HYA_0m_041 | 2.5636 | 37.66 | 3.60E-13 | 600 | 2.7633 | 2.64 | 46   | 7.04E-13 | n/a  | 23.1 | 0.56 |
| HYA_0m_042 | 2.5348 | 40.85 | 2.12E-13 | 185 | 2.6498 | 0.61 | 44.3 | n/a      | n/a  | 23.8 | 1.79 |
| HYA_0m_043 | 2.5488 | 40.33 | 2.23E-13 | 185 | 2.62   | 1.16 | 43.7 | n/a      | n/a  | 26.3 | 1.38 |
| HYA_0m_044 | 2.5556 | 40.23 | 2.29E-13 | 130 | 2.5878 | 0.42 | 41.6 | n/a      | n/a  | 27.7 | 2.51 |
| HYA_0m_045 | 2.5548 | 40.76 | 2.51E-13 | n/a | n/a    | n/a  | n/a  | n/a      | n/a  | n/a  | n/a  |
| HYA_0m_046 | 2.5687 | 40.59 | 2.81E-13 | n/a | n/a    | n/a  | n/a  | n/a      | n/a  | n/a  | n/a  |
| HYA_0m_047 | 2.5582 | 39.91 | 2.60E-13 | n/a | n/a    | n/a  | n/a  | n/a      | n/a  | 29.5 | 3.44 |
| HYA_0m_048 | 2.5523 | 40.37 | 2.08E-13 | n/a | n/a    | n/a  | n/a  | n/a      | n/a  | n/a  | n/a  |

|            |        |       |          |     |        |      |      |          |     |      |      |
|------------|--------|-------|----------|-----|--------|------|------|----------|-----|------|------|
| HYA_0m_049 | 2.5345 | 38.59 | 1.44E-13 | n/a | n/a    | n/a  | n/a  | n/a      | n/a | n/a  | n/a  |
| HYA_0m_050 | 2.5426 | 39.04 | 2.39E-13 | n/a | n/a    | n/a  | n/a  | n/a      | n/a | n/a  | n/a  |
| HYA_0m_051 | 2.5562 | 39.35 | 1.69E-13 | n/a | n/a    | n/a  | n/a  | n/a      | n/a | n/a  | n/a  |
| HYA_0m_052 | 2.532  | 39.92 | 1.47E-13 | n/a | n/a    | n/a  | n/a  | n/a      | n/a | n/a  | n/a  |
| HYA_0m_053 | 2.5858 | 40.02 | 3.35E-13 | 400 | 2.7271 | 1.9  | 45.8 | 5.47E-13 | n/a | n/a  | n/a  |
| HYA_0m_054 | 2.5386 | 38.23 | 2.11E-13 | 400 | 2.6862 | 1.99 | 44.2 | 3.61E-13 | n/a | 26.3 | 1.33 |
| HYA_0m_055 | 2.6033 | 40.35 | 4.80E-13 | 400 | 2.7385 | 1.84 | 45.8 | 7.53E-13 | n/a | n/a  | n/a  |
| HYA_0m_056 | 2.5337 | 39.83 | 1.86E-13 | 600 | 2.7103 | 2.3  | 47   | 4.50E-13 | n/a | 24.1 | 0.68 |
| HYA_0m_057 | 2.5467 | 40.02 | 2.39E-13 | 400 | 2.6791 | 1.84 | 45.7 | 4.27E-13 | 6.8 | n/a  | 1.27 |
| HYA_0m_058 | 2.5504 | 39.76 | 2.54E-13 | 400 | 2.685  | 1.79 | 45.5 | 4.33E-13 | n/a | n/a  | n/a  |
| HYA_0m_059 | 2.5885 | 38.33 | 3.54E-13 | 400 | 2.7295 | 1.82 | 44.2 | 5.69E-13 | 6.3 | n/a  | 1.32 |
| HYA_0m_060 | 2.543  | 41.08 | 2.11E-13 | 400 | 2.6927 | 1.85 | 47.1 | 4.01E-13 | n/a | n/a  | n/a  |
| HYA_0m_061 | 2.5482 | 40.6  | 2.14E-13 | 400 | 2.6909 | 1.91 | 46.6 | 4.13E-13 | n/a | n/a  | n/a  |
| HYA_0m_062 | 2.4618 | 36.8  | n/a      | n/a | n/a    | n/a  | n/a  | n/a      | n/a | n/a  | n/a  |
| HYA_0m_063 | 2.4676 | 37.79 | n/a      | n/a | n/a    | n/a  | n/a  | n/a      | n/a | n/a  | n/a  |
| HYA_0m_064 | 2.4674 | 36.81 | n/a      | n/a | n/a    | n/a  | n/a  | n/a      | n/a | n/a  | n/a  |
| HYA_0m_065 | 2.5072 | 39.93 | n/a      | n/a | n/a    | n/a  | n/a  | n/a      | n/a | n/a  | n/a  |
| HYA_0m_066 | 2.5087 | 36.96 | n/a      | n/a | n/a    | n/a  | n/a  | n/a      | n/a | n/a  | n/a  |
| HYA_0m_067 | 2.5482 | 39.29 | 1.82E-13 | 400 | 2.6286 | 0.9  | 42.5 | 3.10E-13 | n/a | n/a  | n/a  |
| HYA_0m_068 | 2.5449 | 38.61 | 1.56E-13 | 400 | 2.6479 | 1.1  | 42.6 | 2.90E-13 | n/a | n/a  | n/a  |
| HYA_0m_069 | 2.5515 | 39.27 | 1.82E-13 | n/a | n/a    | n/a  | n/a  | n/a      | n/a | n/a  | n/a  |
| HYA_0m_070 | 2.5497 | 38.46 | 2.51E-13 | n/a | n/a    | n/a  | n/a  | n/a      | n/a | 31   | 2.17 |
| HYA_0m_071 | 2.5376 | 39.01 | 1.97E-13 | 130 | 2.5678 | 0.61 | 40.6 | 2.29E-13 | n/a | 29.6 | 1.52 |
| HYA_0m_072 | 2.5956 | 38.86 | 3.96E-13 | 600 | 2.7501 | 1.91 | 45.1 | 7.42E-13 | n/a | n/a  | n/a  |
| HYA_0m_073 | 2.5492 | 40    | 2.12E-13 | 400 | 2.6811 | 1.89 | 45.6 | 3.82E-13 | n/a | 24.7 | 1.1  |
| HYA_0m_074 | 2.5405 | 38.77 | 3.45E-13 | n/a | n/a    | n/a  | n/a  | n/a      | n/a | n/a  | n/a  |
| HYA_0m_075 | 2.536  | 40.02 | 2.11E-13 | 400 | 2.6878 | 2.32 | 46.5 | 4.18E-13 | 5.9 | n/a  | 0.8  |
| HYA_0m_076 | 2.5992 | 38.34 | 4.27E-13 | 400 | 2.6612 | 1.04 | 41.3 | 6.46E-13 | n/a | n/a  | n/a  |

Table S3. A summary of the Brazilian disc parameters for as-collected and TT samples.

| As-collected  |                      |          |      | Post-thermal treatment |                |          |       |
|---------------|----------------------|----------|------|------------------------|----------------|----------|-------|
| Sample        | Density              | Porosity | TT   | Density                | Mass Reduction | Porosity | UTS   |
|               | (g/cm <sup>3</sup> ) | (%)      | (°C) | (g/cm <sup>3</sup> )   | (g)            | (%)      | (MPa) |
| HYA_0m_001_Br | 2.4899               | 31.09    | n/a  | n/a                    | n/a            | n/a      | 1.53  |
| HYA_0m_002_Br | 2.5139               | 33.67    | n/a  | n/a                    | n/a            | n/a      | 1.21  |
| HYA_0m_003_Br | 2.4877               | 32.05    | n/a  | n/a                    | n/a            | n/a      | 1.69  |
| HYA_0m_004_Br | 2.545                | 33.04    | n/a  | n/a                    | n/a            | n/a      | 1.5   |
| HYA_0m_005_Br | 2.5824               | 32.28    | 130  | 2.6346                 | 0.32           | 35.67    | 0.98  |
| HYA_0m_006_Br | 2.5626               | 36.44    | 130  | 2.6214                 | 0.39           | 39.95    | 0.96  |
| HYA_0m_007_Br | 2.562                | 38.9     | 130  | 2.6166                 | 0.42           | 42.4     | 0.92  |
| HYA_0m_008_Br | 2.5598               | 34.78    | 130  | 2.6157                 | 0.36           | 38.41    | 1.07  |
| HYA_0m_009_Br | 2.5453               | 38.07    | 130  | 2.6059                 | 0.39           | 41.69    | 0.79  |
| HYA_0m_010_Br | 2.5122               | 37.56    | 185  | 2.5993                 | 0.47           | 42.36    | 0.97  |
| HYA_0m_011_Br | 2.6096               | 36.32    | 185  | 2.6402                 | 0.33           | 38.99    | 0.82  |
| HYA_0m_012_Br | 2.52                 | 41.33    | 185  | 2.6095                 | 0.42           | 45.86    | 0.86  |
| HYA_0m_013_Br | 2.524                | 39.53    | 185  | 2.6098                 | 0.49           | 43.86    | 0.91  |
| HYA_0m_014_Br | 2.4942               | 36.79    | 185  | 2.5956                 | 0.59           | 42.22    | 1     |
| HYA_0m_015_Br | 2.5498               | 36.18    | 400  | 2.7235                 | 0.76           | 44.47    | 0.7   |
| HYA_0m_016_Br | 2.568                | 39.51    | 400  | 2.6707                 | 0.66           | 45.59    | 0.63  |
| HYA_0m_017_Br | 2.5964               | 35.17    | 400  | 2.707                  | 0.66           | 41.5     | 0.68  |
| HYA_0m_018_Br | 2.518                | 40.18    | 400  | 2.6618                 | 0.75           | 47.3     | 0.69  |
| HYA_0m_019_Br | 2.5002               | 36.55    | 400  | 2.6419                 | 0.82           | 44.19    | 0.8   |
| HYA_0m_020_Br | 2.5171               | 39.02    | 600  | 2.6952                 | 0.73           | 46.69    | 0.7   |
| HYA_0m_021_Br | 2.5885               | 35.91    | 600  | 2.776                  | 0.79           | 40.97    | 0.66  |
| HYA_0m_022_Br | 2.5028               | 38.59    | 600  | 2.7167                 | 0.98           | 48.32    | 0.57  |
| HYA_0m_023_Br | 2.5168               | 38.59    | 600  | 2.717                  | 1.01           | 47.64    | 0.66  |
| HYA_0m_024_Br | 2.5295               | 35.99    | 600  | 2.7473                 | 0.94           | 46.16    | 0.54  |

## 2. Clay-separated XRD

Clay separated XRD measurements were performed on as-collected, surficial hyaloclastite for unglycolated and glycolated samples. The d(060) peak is at  $60.35^\circ$ , whilst the d(001) peak transitions from  $15 \text{ \AA}$  to  $16.2 \text{ \AA}$ , upon glycolation. Raw X-ray diffractograms are presented in Figure S1 a and b.

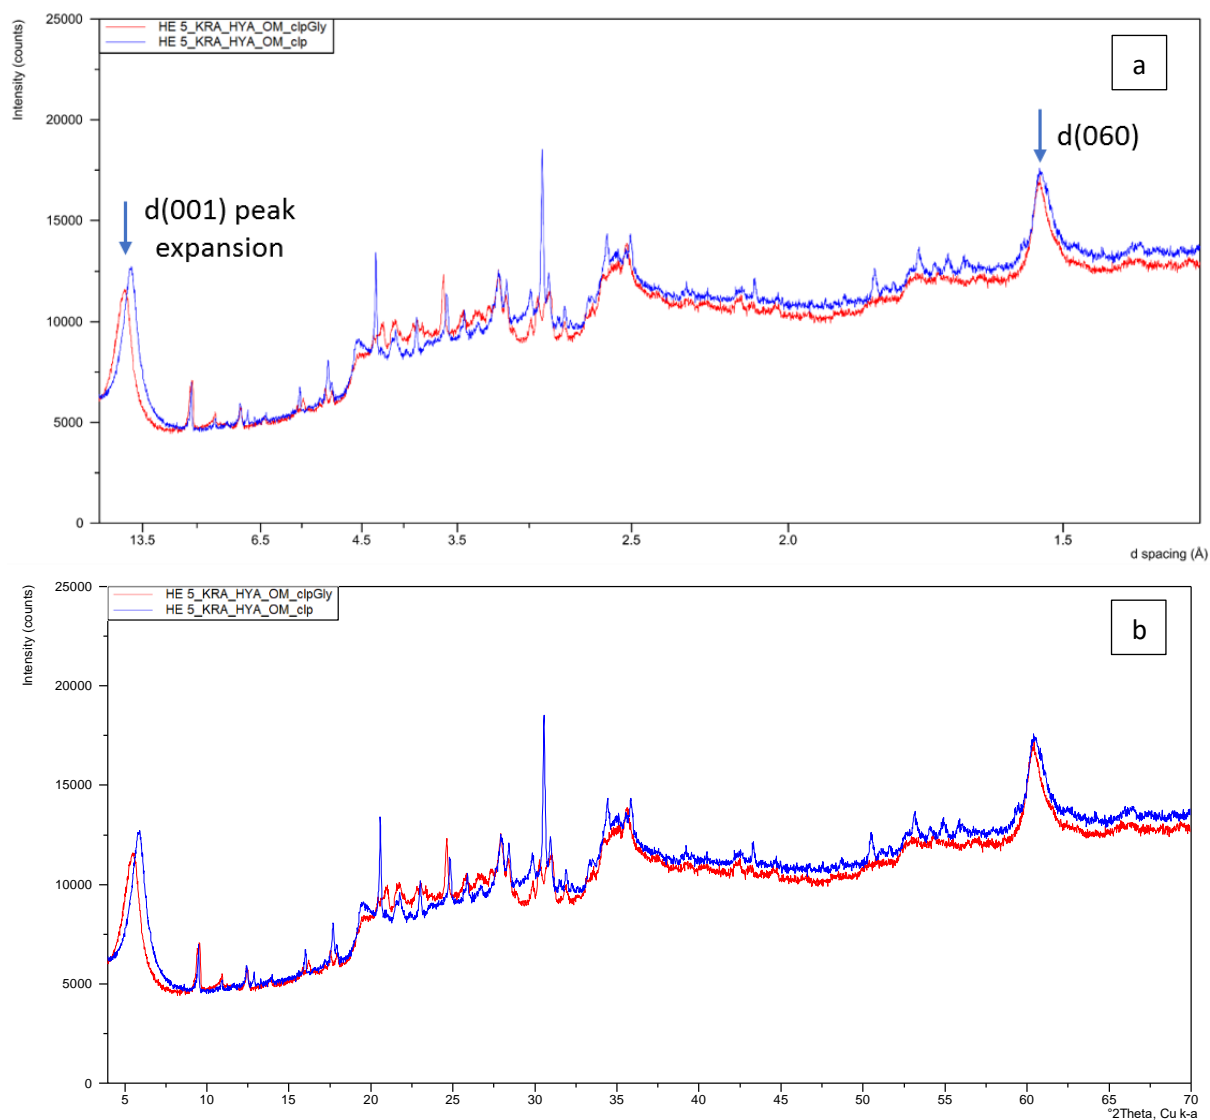

**Figure S1.** X-ray diffractograms of as-collected, glycolated and unglycolated surficial hyaloclastite; **a.** intensity presented against  $2\theta$  Cu k- $\alpha$ ; **b.** intensity presented against angstroms.

## 3. QEMSCAN Images

We present here the full QEMSCAN images, acquired at  $20 \mu\text{m}$  for as-collected (Fig. S2) and thermally treated (TT) samples (Fig. S3 – S6), that are used in the quantification of the mineral distribution (Table 2, main paper). Fig. S7 provides an annotated example of the various petrographic images presented in Figure 3 (main paper).

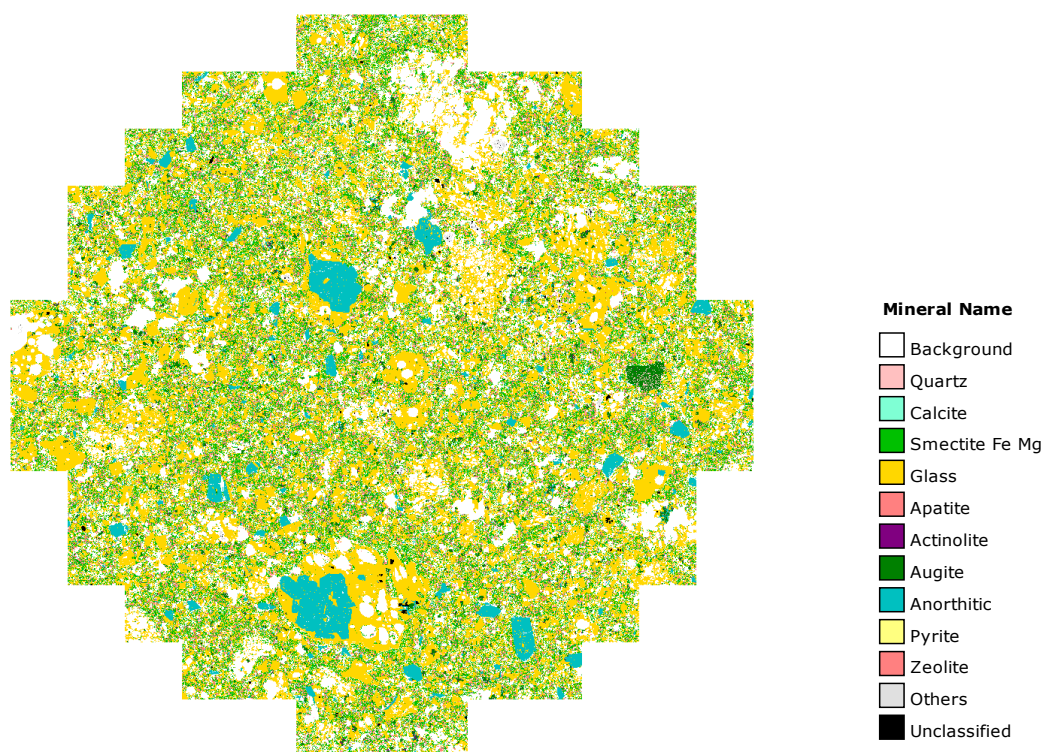

**Figure S2.** Mineral distribution of as-collected hyaloclastite, acquired using QEMSCAN at 20  $\mu\text{m}$  resolution.

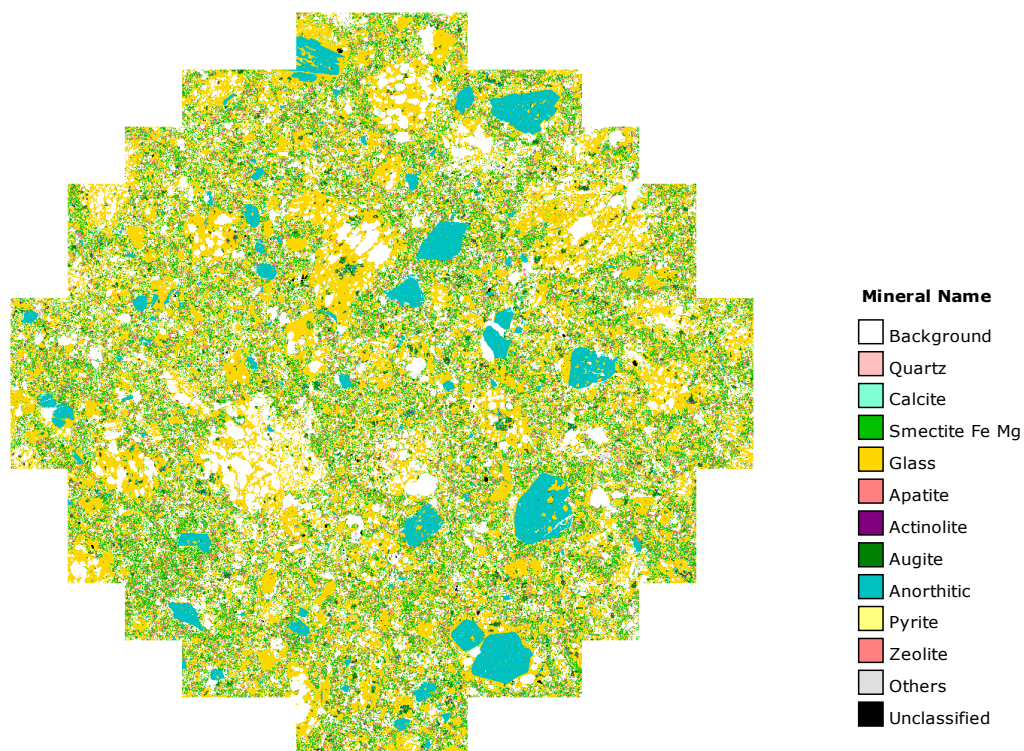

**Figure S3.** Mineral distribution of hyaloclastite, TT to 130°C for 12 hours, and acquired using QEMSCAN at 20  $\mu\text{m}$  resolution.



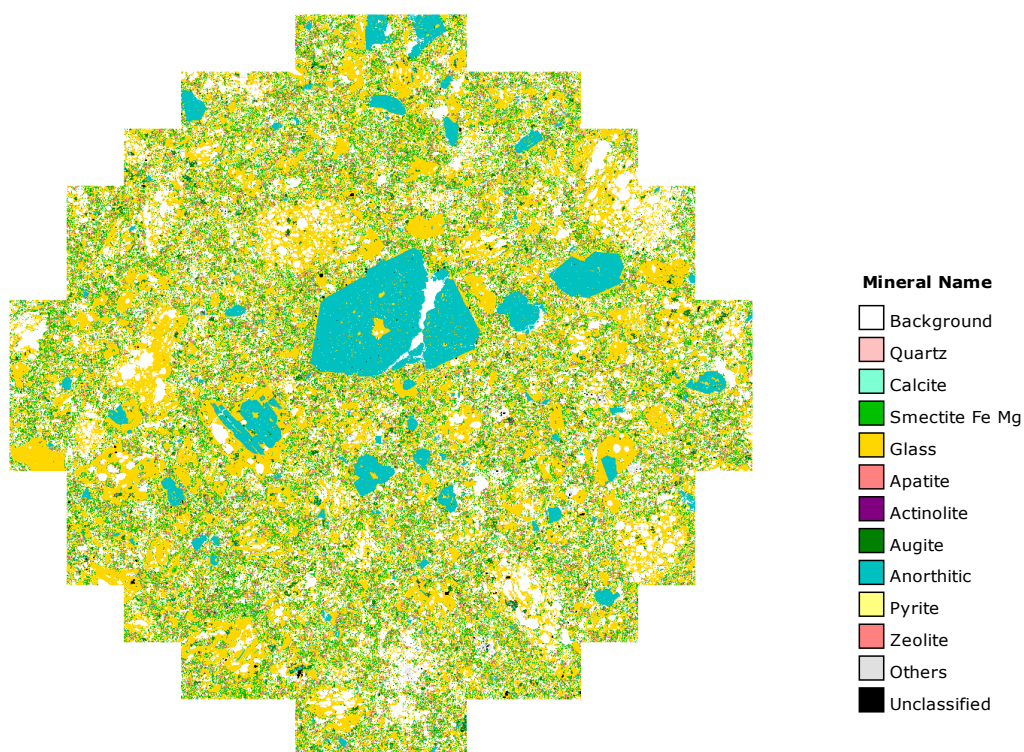

**Figure S4.** Mineral distribution of hyaloclastite, TT to 185°C for 12 hours, and acquired using QEMSCAN at 20 μm resolution.

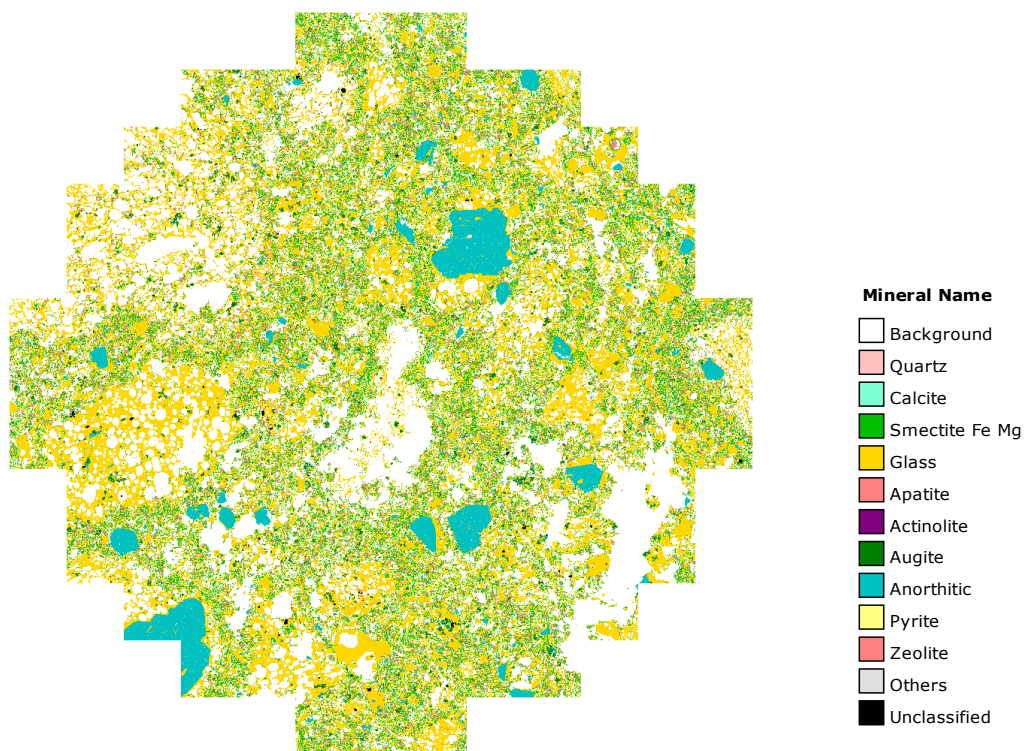

**Figure S5.** Mineral distribution of hyaloclastite, TT to 400°C for 12 hours, and acquired using QEMSCAN at 20 μm resolution.

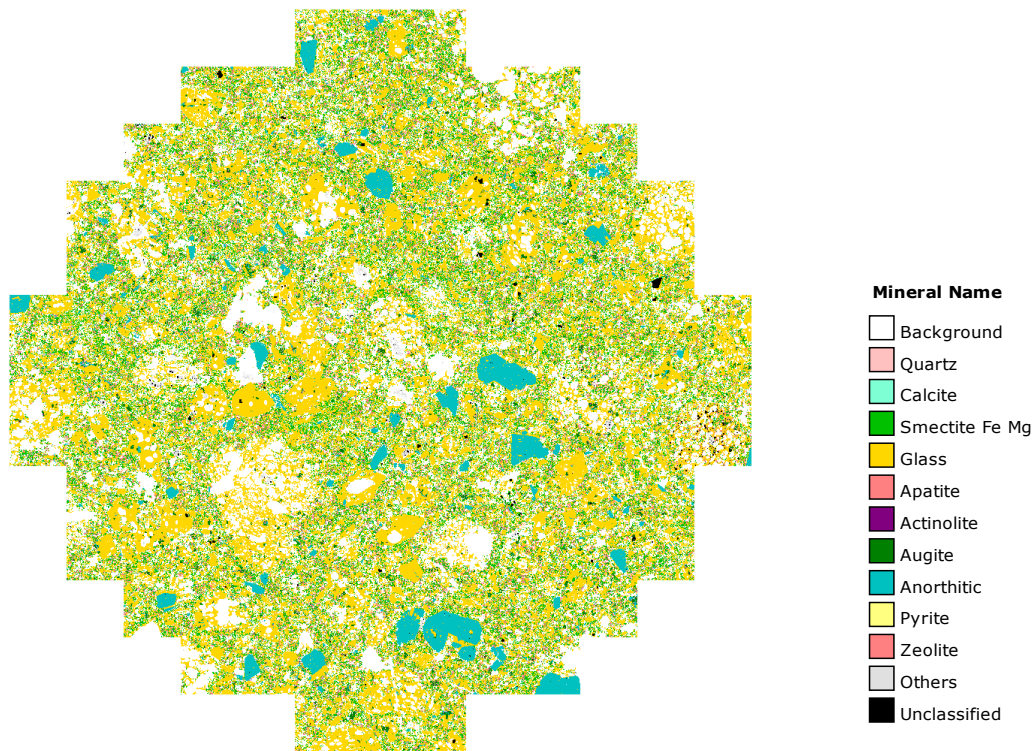

**Figure S6.** Mineral distribution of hyaloclastite, TT to 600°C for 12 hours, and acquired using QEMSCAN at 20  $\mu\text{m}$  resolution.

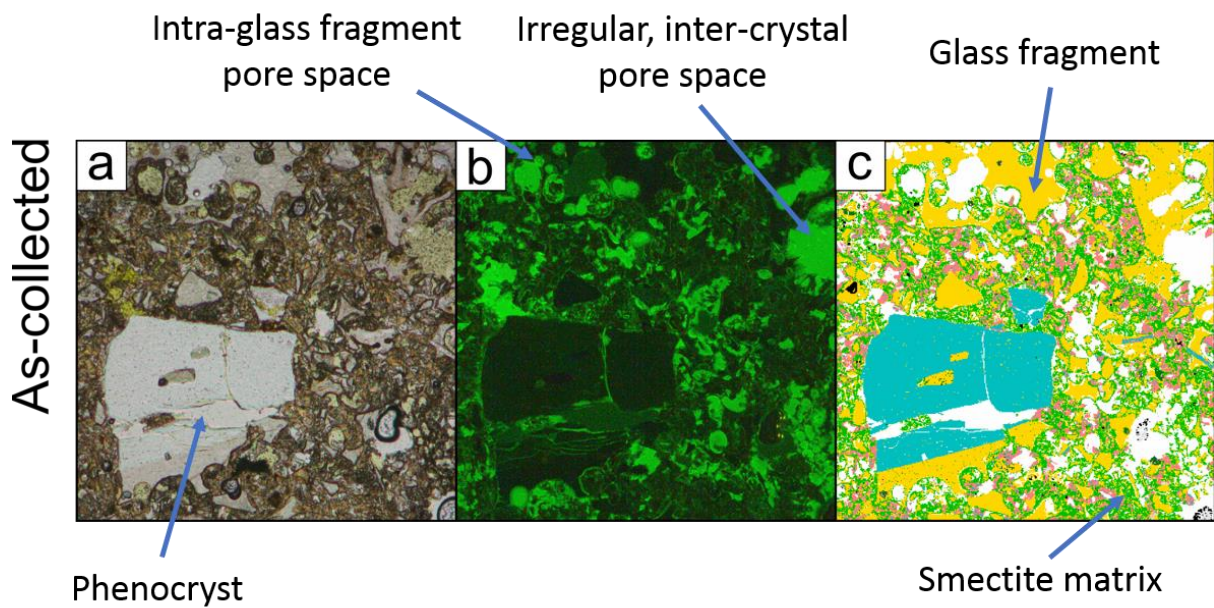

**Figure S7.** Annotated example from Figure 3 (main paper). a. Plain polarised light image from an optical microscope; b. Ultraviolet pore space map using florescent dyed thin section; c. QEMSCAN image showing mineral distribution

#### 4. Additional Strength Curves

Figure 6c in the main paper presents a subset of the total tensile strength dataset, for easier viewing. Here, we present the other strength curves not shown in the main paper (Fig. S8).



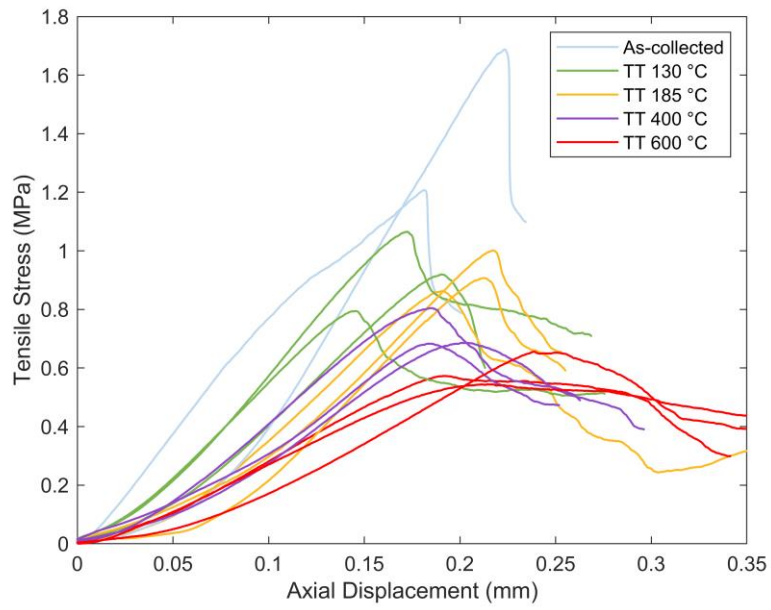

**Figure S8.** Additional tensile strength curves for as-collected and TT surficial material.
